# Supplementary material for: Reporting of retrospective registration in clinical trial publications: a cross-sectional study of German trials
Source: PubMed Central journal article supplement — BMJ Open. 2023 Apr 18;13(4):e069553. doi: 10.1136/bmjopen-2022-069553 (PMC10124266; doi:10.1136/bmjopen-2022-069553), 2023-04-18
Supplement: bmjopen-2022-069553supp002.pdf [file bmjopen-2022-069553supp002.pdf]

Supplementary Table 2: Basic characteristics of included trials

|                          | <b>Retrospectively registered trials (n = 956)</b> | <b>Prospectively registered trials (n = 971)</b> |
|--------------------------|----------------------------------------------------|--------------------------------------------------|
| <b>Registry</b>          |                                                    |                                                  |
| ClinicalTrials.gov       | 713                                                | 766                                              |
| DRKS                     | 243                                                | 205                                              |
| <b>Sponsorship</b>       |                                                    |                                                  |
| Industry                 | 112                                                | 163                                              |
| Other                    | 844                                                | 808                                              |
| <b>Phase</b>             |                                                    |                                                  |
| Phase 1                  | 33                                                 | 71                                               |
| Phase 2                  | 122                                                | 206                                              |
| Phase 3                  | 91                                                 | 134                                              |
| Phase 4                  | 78                                                 | 99                                               |
| No phase                 | 632                                                | 461                                              |
| <b>Intervention type</b> |                                                    |                                                  |
| Behavioral               | 94                                                 | 72                                               |
| Biological               | 18                                                 | 32                                               |
| Device                   | 199                                                | 138                                              |
| Dietary Supplement       | 40                                                 | 30                                               |
| Drug                     | 186                                                | 340                                              |
| Genetic                  | 1                                                  | 1                                                |
| Procedure                | 96                                                 | 70                                               |
| Radiation                | 6                                                  | 9                                                |
| Other                    | 73                                                 | 74                                               |
| Not given                | 243                                                | 205                                              |
